# Supplementary material
Source: PubMed Central journal article supplement (PMC10361635)
Supplement: NIHMS1911403-supplement-320324_Major_Resources_Table.pdf [file NIHMS1911403-supplement-320324_Major_Resources_Table.pdf]

## Major Resources Table

In order to allow validation and replication of experiments, all essential research materials listed in the Methods should be included in the Major Resources Table below. Authors are encouraged to use public repositories for protocols, data, code, and other materials and provide persistent identifiers and/or links to repositories when available. Authors may add or delete rows as needed.

### Animals (in vivo studies)

| Species | Vendor or Source | Background Strain | Sex   | Persistent ID / URL |
|---------|------------------|-------------------|-------|---------------------|
| Mouse   | JAX 008462       | C57BL6/J          | M / F |                     |
|         |                  |                   |       |                     |
|         |                  |                   |       |                     |

### Genetically Modified Animals

|        | Species | Vendor or Source | Background Strain | Other Information | Persistent ID / URL |
|--------|---------|------------------|-------------------|-------------------|---------------------|
| Parent | Mouse   | JAX 008462       | C57BL6/J          | Trp53 tm1Brn/J    |                     |
| Parent | Mouse   | M Tallquist      | C57BL6/J          | Tcf21-MerCreMer   |                     |
| Parent | Mouse   | JAX 007676       | C57BL6/J          | Rosa-mTmG         |                     |

### Antibodies

| Target antigen       | Vendor or Source     | Catalog #      | Working concentration | Lot # (preferred but not required) | Persistent ID / URL |
|----------------------|----------------------|----------------|-----------------------|------------------------------------|---------------------|
| Acta2                | Sigma-Aldrich        | A5228          | 1:250                 |                                    |                     |
| BrdU                 | Novus Biological     | NB500-169      | 1:200                 |                                    |                     |
| CHP (biotin)         | 3Helix               |                | 1:100                 |                                    |                     |
| ERG                  | Abcam                | ab92513        | 1:100                 |                                    |                     |
| GFP                  | Torrey Pines Biolabs | TP401          | 1:100                 |                                    |                     |
| IsolectinB4-FITC     | Sigma-Aldrich        | L2895          | 1:50                  |                                    |                     |
| Ki67                 | Novus Biological     | NB110-89717    | 1:100                 |                                    |                     |
| p16 <sup>Ink4a</sup> | Abcam                | ab189034       | 1:100                 |                                    |                     |
| P53                  | Leica                | NCL-L-p53-CM5p | 1:500                 |                                    |                     |
| PDGFR $\alpha$       | R&D Systems          | AF1062         | 1:100                 |                                    |                     |
| SA-555               | LifeTech             | S21381         | 1:250                 |                                    |                     |
| WGA-A647             | Thermo-Fisher        | W32466         | 1:100                 |                                    |                     |

### DNA/cDNA Clones

| Clone Name | Sequence | Source / Repository | Persistent ID / URL |
|------------|----------|---------------------|---------------------|
|            |          |                     |                     |
|            |          |                     |                     |
|            |          |                     |                     |

### Cultured Cells

| Name | Vendor or Source | Sex (F, M, or unknown) | Persistent ID / URL |
|------|------------------|------------------------|---------------------|
|      |                  |                        |                     |
|      |                  |                        |                     |
|      |                  |                        |                     |

**Data & Code Availability**

| Description         | Source / Repository | Persistent ID / URL |
|---------------------|---------------------|---------------------|
| Single cell RNA-seq | GSE165455           |                     |
|                     |                     |                     |
|                     |                     |                     |

**Other**

| Description | Source / Repository | Persistent ID / URL |
|-------------|---------------------|---------------------|
|             |                     |                     |
|             |                     |                     |
|             |                     |                     |

## ARRIVE GUIDELINES

The ARRIVE guidelines (<https://arriveguidelines.org/>) are a checklist of recommendations to improve the reporting of research involving animals. Key elements of the study design should be included below to better enable readers to scrutinize the research adequately, evaluate its methodological rigor, and reproduce the methods or findings.

### Study Design

| Groups               | Sex   | Age      | Number (prior to experiment) | Number (after termination) | Littermates (Yes/No) | Other description          |
|----------------------|-------|----------|------------------------------|----------------------------|----------------------|----------------------------|
| Group 1 (Control)    | M / F | 12 weeks | 39                           | 28                         | Yes                  | Tcf21-MerCreMer;p53-wt/wt  |
| Group 2 (P53-CF Het) | M / F | 12 weeks | 12                           | 11                         | Yes                  | Tcf21-MerCreMer; p53-fl/+  |
| Group 3 (p53-CF KO)  | M / F | 12 weeks | 34                           | 23                         | Yes                  | Tcf21-MerCreMer; p53-fl/fl |

Echocardiography N (Figure 4A-D):

|           |         |          |         |
|-----------|---------|----------|---------|
| Baseline: | 39 (WT) | 12 (HET) | 34 (KO) |
| Day 7:    | 33 (WT) | 12 (HET) | 30 (KO) |
| Day 14:   | 31 (WT) | 12 (HET) | 30 (KO) |
| Day 21:   | 28 (WT) | 11 (HET) | 23 (KO) |
| Day 28:   | 28 (WT) | 11 (HET) | 23 (KO) |

**Sample Size:** Please explain how the sample size was decided Please provide details of any a *prior* sample size calculation, if done.

**Inclusion Criteria :** NA

**Exclusion Criteria:** Mice were only excluded from the study if a TAC stenosis pressure gradient was less than 90 mm/Hg, indicating failure of a sufficient aortic constriction. No mice were excluded due to death, removal at an earlier timepoint for histological analyses, or failure to achieve expected phenotype.

**Randomization:** NA

**Blinding:** Surgery and echo personnel are blinded to the genotype. Quantification of morphometry was performed by personnel who are blinded to genotype.

DOI [to be added]
